# Supplementary material for: Abortion as empowerment: reproductive rights activism in a legally restricted context
Source: Springer Nature journal article supplement (doi:10.1186/s12884-017-1498-y), 2017-11-01
Supplement: MOESM1 [file 15205228]

(Name of clinic)

Health services for women requiring abortion care

Medical History

Date: \_\_\_\_/\_\_\_\_/\_\_\_\_

Full Name: \_\_\_\_\_

Age: \_\_\_\_\_ Government ID Number: \_\_\_\_\_

Address: \_\_\_\_\_

Telephone number: \_\_\_\_\_

Referred by: \_\_\_\_\_

Insurance Plan: \_\_\_\_\_

Nationality: \_\_\_\_\_

Education level: \_\_\_\_\_

Occupation: \_\_\_\_\_

Employment situation: \_\_\_\_\_

Romantic relationship: \_\_\_\_\_

Description of the situation: \_\_\_\_\_

\_\_\_\_\_

\_\_\_\_\_

Has already made the decision: \_\_\_\_\_ Alone: \_\_\_\_\_ Accompanied by: \_\_\_\_\_

Has not made a decision: \_\_\_\_\_

**Clinical History**

| Sonogram | Date: | Date: | Date: | Date: |
|----------|-------|-------|-------|-------|
|          |       |       |       |       |

Date of last menstrual period (LMP):

Gestational age based on LMP \_\_\_\_\_ on \_\_\_\_\_

**Obstetric History**

Pregnancies: \_\_\_\_\_ Children (ages): \_\_\_\_\_

Births: \_\_\_\_\_

C-sections: \_\_\_\_\_ Date of last C-section: \_\_\_\_\_

Pregnancies not taken to term: \_\_\_\_\_ Miscarriages: \_\_\_\_\_

Induced abortions: \_\_\_\_\_ Method used to induce abortion: \_\_\_\_\_

Medical practice used, or Alternative and Complementary Medicine: \_\_\_\_\_

(Name of clinic)

**Risk factors:**

Blood type and RH factor: \_\_\_\_\_

Long term steroid treatment: \_\_\_\_\_

Severe anemia: \_\_\_\_\_

Blood clotting disorders: \_\_\_\_\_

Coronary or cardiovascular risk: \_\_\_\_\_

Last C-section: \_\_\_\_\_

IUD: \_\_\_\_\_

Frequent aspirin use: \_\_\_\_\_

**Useful information:** \_\_\_\_\_

---

---

---

---

---

---

**Interviews:** \_\_\_\_\_

---

---

---

---

---

---

---

---
